# Supplementary material for: Canonical Wnt signaling inhibits osteoclastogenesis independent of osteoprotegerin
Source: PubMed Central journal article supplement — J Cell Biol. 2013 Feb 18;200(4):537–49. doi: 10.1083/jcb.201207142 (PMC3575535; doi:10.1083/jcb.201207142), 2013-02-18
Supplement: supp_jcb.201207142_JCB_201207142_sm.pdf [file supp_jcb.201207142_JCB_201207142_sm.pdf]

Albers et al., <http://www.jcb.org/cgi/content/full/jcb.201207142/DC1>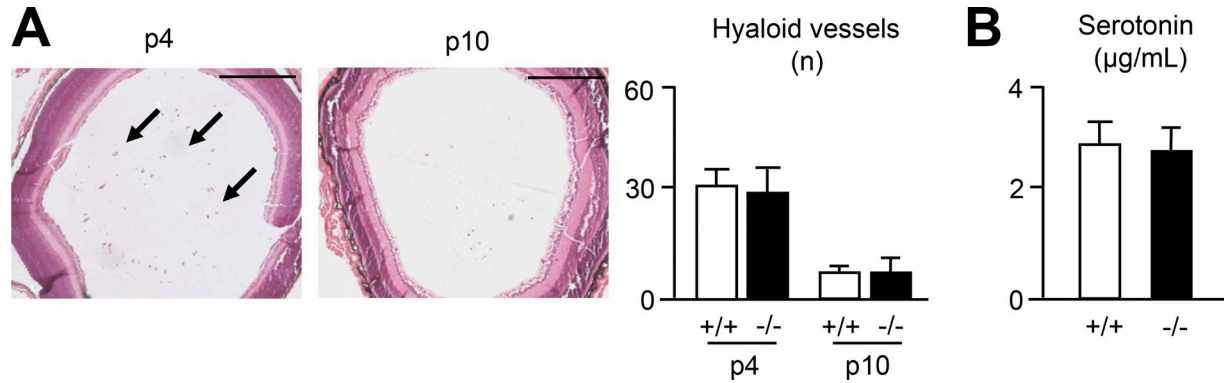

Figure S1. **Postnatal regression of hyaloid vessels and peripheral serotonin production are unaffected in *Fzd8*-deficient mice.** (A) Hematoxylin/eosin staining of eyeballs from 4-d-old (P4) and 10-d-old (P10) *Fzd8*-deficient mice. Quantification of hyaloid vessels is given on the right. Bars, 250  $\mu$ m. (B) Serotonin levels in the serum of 24-wk-old wild-type and *Fzd8*-deficient mice. All error bars represent mean  $\pm$  SD ( $n = 6$ ). Asterisks indicate statistically significant differences between the two groups.

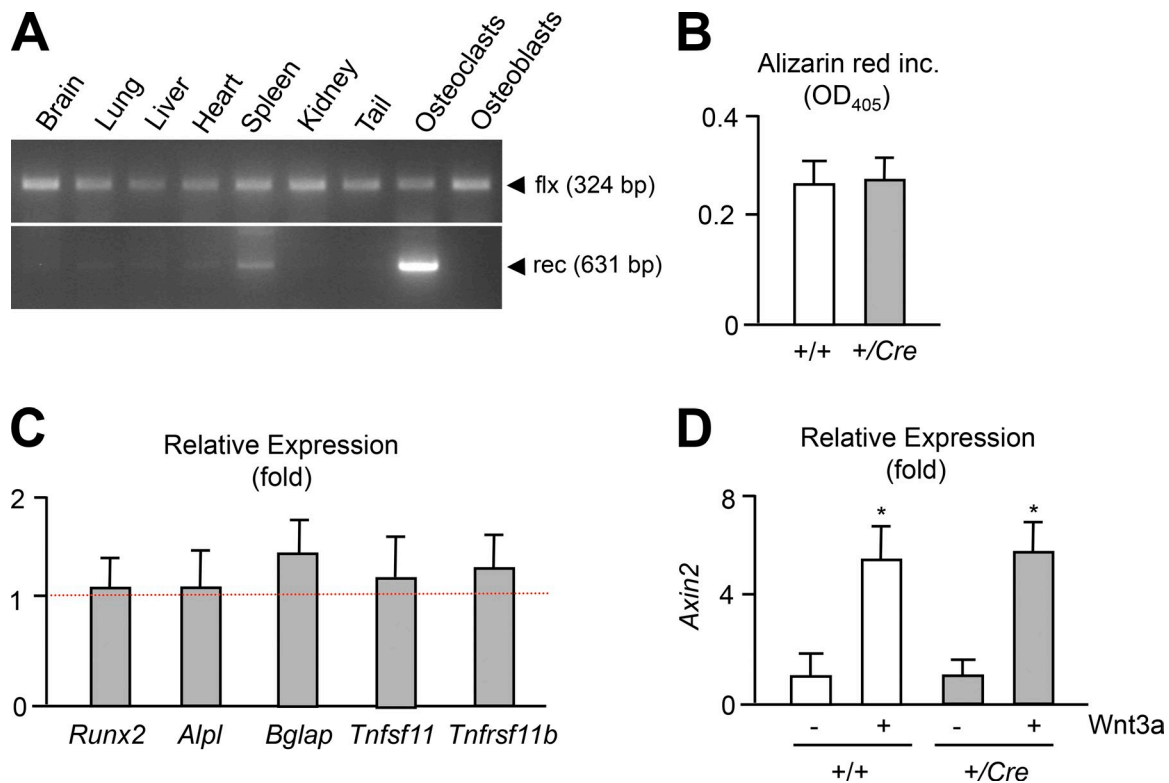

Figure S2.  **$\beta$ -catenin inactivation in the osteoclast lineage does not affect osteoblast differentiation and gene expression.** (A) Genomic PCR for the floxed or recombined *Catnb1* allele using DNA from various tissues, bone marrow-derived osteoclasts (day 7 of differentiation), and calvarial osteoblasts (day 15 of differentiation). (B) Quantification of alizarin red incorporation in primary osteoblasts from *Ctnnb1*<sup>fl/fl</sup>/*LysM*<sup>+/+</sup> and *Ctnnb1*<sup>fl/fl</sup>/*LysM*<sup>+/cre</sup> mice. Error bars represent mean  $\pm$  SD ( $n = 4$ ). (C) qRT-PCR expression analysis of the indicated genes in *Ctnnb1*<sup>fl/fl</sup>/*LysM*<sup>+/cre</sup> osteoblasts relative to *Ctnnb1*<sup>fl/fl</sup>/*LysM*<sup>+/+</sup> cultures. Error bars represent mean  $\pm$  SD ( $n = 4$ ). (D) qRT-PCR expression analysis for *Axin2* in osteoblasts after stimulation with 200 ng/ml Wnt3a for 6 h. Error bars represent mean  $\pm$  SD ( $n = 4$ ). Asterisks indicate statistically significant differences compared with untreated controls.
